# Supplementary material for: Close membrane-membrane proximity induced by Ca2+-dependent multivalent binding of synaptotagmin-1 to phospholipids
Source: Springer Nature journal article supplement (doi:10.1038/nsmb1056), 2006-02-19
Supplement: nsmb1056-S8.pdf [file nsmb1056-S8.pdf]

## **Membrane-Membrane Proximity Induced by Ca<sup>2+</sup>-dependent Multivalent Binding of Synaptotagmin 1 to Phospholipids**

D. Araç, X. Chen, H. A. Khant, J. Ubach, S. J. Ludtke, M. Kikkawa, A. E. Johnson, W. Chiu, T. C. Südhof and J. Rizo

### **Supplementary Methods**

#### **Protein expression and purification**

Wild type and mutant C<sub>2</sub>AB-fragments were expressed in Escherichia coli BL21 cells at 20°C overnight. The cell pellet was resuspended in 40 mM Tris (pH 8.2), 200 mM NaCl, 1% Triton X-100 buffer containing 2 mM DTT and protease inhibitors. The cells were passed 3 times through an EmulsiFlex-C5 cell disrupter (Avensin) at 14000 psi and spun at 28000 g for 30 min. The supernatant was incubated with glutathione-sepharose beads. The resin was extensively washed with at least 200 ml of 40 mM Tris (pH 8.2), 200 mM NaCl buffer followed by 200 ml of 40 mM Tris (pH 8.2), 200 mM NaCl, 50 mM CaCl<sub>2</sub> buffer, which was repeated 2 times. The C<sub>2</sub>AB-fragment was cleaved from the GST moiety by thrombin (12 units) in 10 ml of thrombin cleavage buffer (50 mM Tris [pH 8.0], 200 mM NaCl, 2.5 mM CaCl<sub>2</sub>, 1 mM DTT) at 25°C for 3 hrs. The protein was eluted from the resin with 200 mM NaP (pH 6.2), 300 mM NaCl buffer and purified by cation exchange chromatography on SourceS column (Pharmacia) in 50 mM NaAc (pH 6.2), 5 mM CaCl<sub>2</sub> buffer using a linear gradient from 300 mM to 600 mM NaCl in 8 column volumes. UV spectra were acquired on a Hewlett-Packard 8452A spectrophotometer to verify the lack of bacterial contaminants, which absorb at 260 nm. Proteins were stored at -80°C after adding 0.3 mM TCEP to the samples.
